# Supplementary material
Source: Research Square preprint supplement (doi:10.21203/rs.3.rs-9965442/v1)
Supplement: Supplementary file 1 [file e662d048d90702e1348e5260.pdf]

Supplementary Information  
for  
**Dissecting metabolic burden in  
*Pseudomonas putida* reveals precursor  
limitation in heterologous lycopene  
production**

by

Carina Meiners, Lucas Hermann, Mishela Stoja, Andreas Kremling,  
Katharina Pflüger-Grau\*

Professorship of Systems Biotechnology, Technical University of  
Munich, Boltzmannstraße 15, 85748 Garching

**\*For correspondence:** Katharina Pflüger-Grau, Professorship of Systems  
Biotechnology, Technical University of Munich, Boltzmannstraße 15, 85748 Garching  
(Germany), Tel: +49 89 289 15765, e-mail: [k.pflueger-grau@tum.de](mailto:k.pflueger-grau@tum.de)

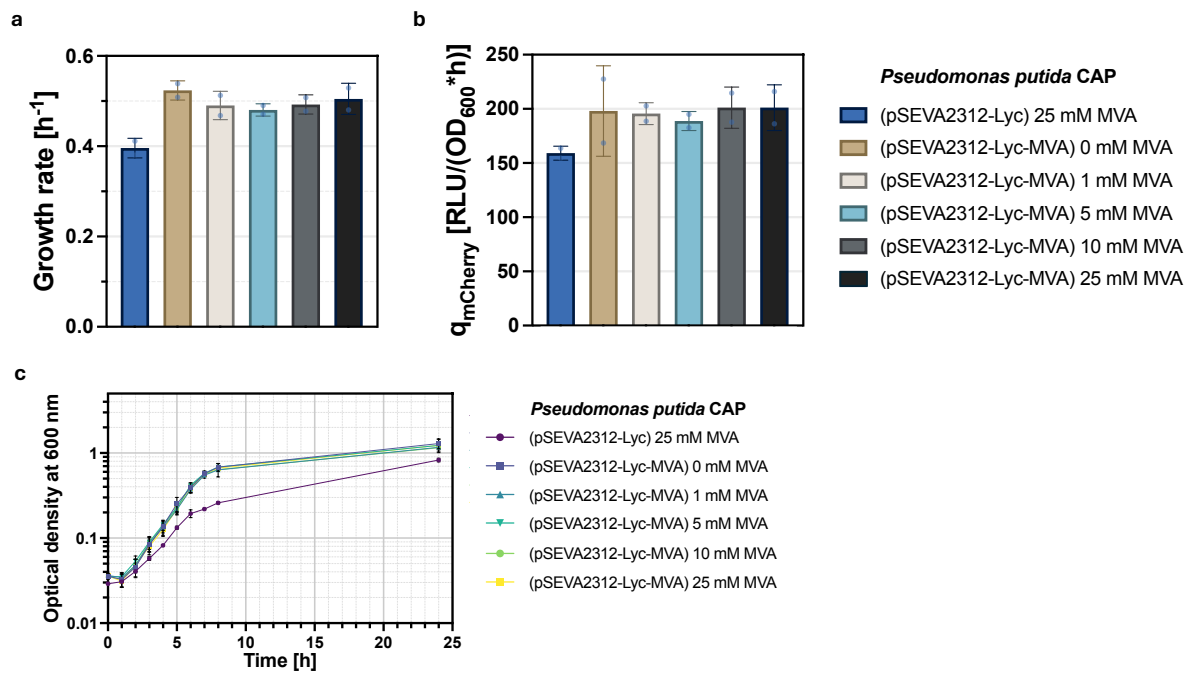

Figure S1 Growth rate (a), capacity estimated from mCherry fluorescence rate (b), and growth (c) of *P. putida* CAP (pSEVA2312-Lyc) and *P. putida* CAP (pSEVA2312-Lyc-MVA) supplemented with different concentrations of mevalonate.

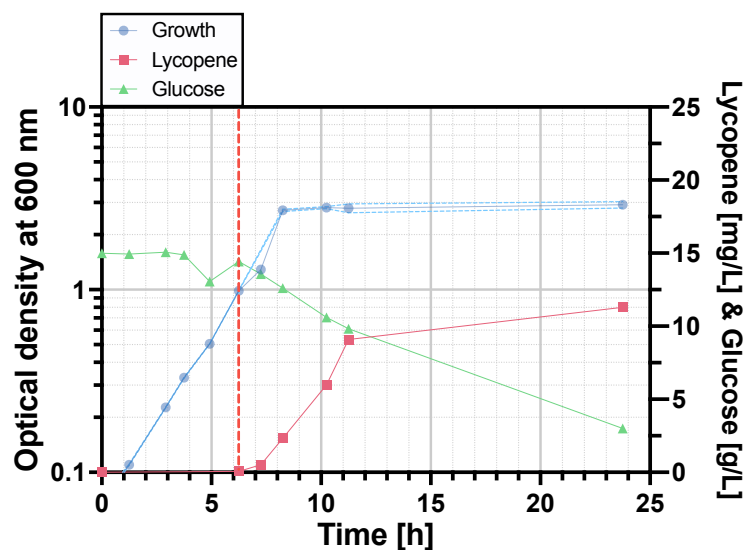

Figure S2 Growth (blue), lycopene concentration (red), and glucose concentration (green) during the repeated batch cultivation of *P. putida* CAP (pSEVA2312-Lyc-MVA) in a stirred-tank bioreactor containing M9 mineral medium supplemented with 15 g/L glucose. The pH was maintained at 7, and pO<sub>2</sub> above 40%. The red-dotted line marks the time point of induction with 1 mM CHPA.

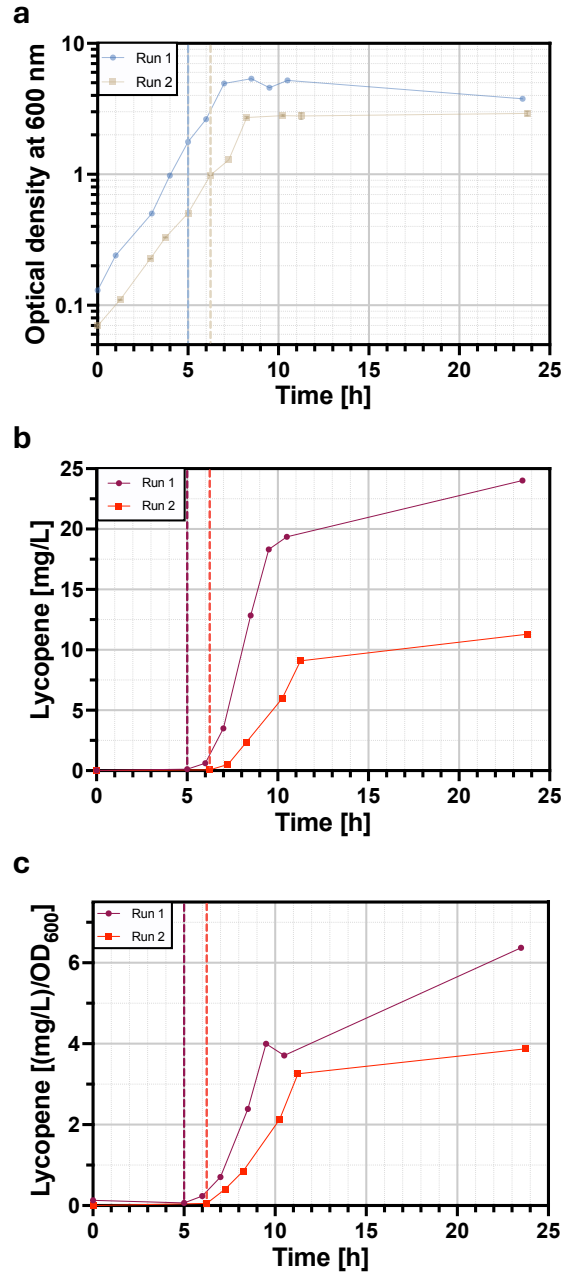

**Figure S3 Growth (a) lycopene titer (b) and lycopene concentration normalized to the optical density (c) of *P. putida* CAP (pSEVA2312-Lyc-MVA) of two independent batch processes (Run 1 and Run 2).** Batch processes were performed in M9 mineral medium supplemented with 15 g/L glucose. The pH was maintained at 7, and pO<sub>2</sub> above 40%. The dotted lines mark the time point of induction with 1 mM CHPA.

**Table S1** Time intervals used for the determination of specific growth rates ( $\mu$ ) by linear regression, listed for each strain and experimental condition, and grouped according to the corresponding figures.

| <b>Strain</b>        |                                 | <b>Time intervals for growth rate [h]</b> |
|----------------------|---------------------------------|-------------------------------------------|
| <b>Figure 2</b>      |                                 |                                           |
| <i>P. putida</i> CAP | (pSEVA2312-Lyc)                 | 3-9                                       |
|                      | (pSEVA2312-Lyc) not induced     | 3-9                                       |
|                      | (pSEVA438-Lyc)                  | 3-8                                       |
|                      | (pSEVA438-Lyc) not induced      | 2-9                                       |
| <b>Figure 3</b>      |                                 |                                           |
| <i>P. putida</i> CAP | (pSEVA2312-Lyc-MVA)             | 1-5                                       |
|                      | (pSEVA2312-Lyc-MVA) not induced | 1-6                                       |
|                      | (pSEVA438-Lyc-MVA)              | 1-6                                       |
|                      | (pSEVA438-Lyc-MVA) not induced  | 0-7                                       |
| <b>Figure 5</b>      |                                 |                                           |
| <i>P. putida</i> CAP | (pSEVA2312-Lyc) 5 mM MVA        | 1-5                                       |
|                      | (pSEVA2312-Lyc-MVA) 0 mM MVA    | 1-6                                       |
|                      | (pSEVA2312-Lyc-MVA) 5 mM MVA    | 1-6                                       |
| <b>Figure S1</b>     |                                 |                                           |
| <i>P. putida</i> CAP | (pSEVA2312-Lyc)                 | 2-6                                       |
|                      | (pSEVA2312-Lyc-MVA) 0 mM        | 1-6                                       |
|                      | (pSEVA2312-Lyc-MVA) 1 mM        | 1-7                                       |
|                      | (pSEVA2312-Lyc-MVA) 5 mM        | 1-7                                       |
|                      | (pSEVA2312-Lyc-MVA) 10 mM       | 1-7                                       |
|                      | (pSEVA2312-Lyc-MVA) 25 mM       | 1-7                                       |
